# Supplementary material
Source: HighWire-hosted journal article supplement (https://ard.bmj.com/content/77/1/21)
Supplement: inline-supplementary-material-4 [file inline-supplementary-material-4.docx]

**Figure S2. Associations of week 48 clinical response with baseline and week 16 biomarker levels.** (A, B) Serum CRP, (C, D) serum IL-6, and (E, F) erythrocyte sedimentation rate (y-axis, log2-transformed) are stratified on x-axis by visit (week 0 and week 16) and clinical response group (Yes, Y; and No, N) for (A, C, E) having a flare between weeks 16 and 48 or (B, D, F) being in clinical remission at week 48. Data presented as symbols representing individual participants and summarized by box (inter-quartile range and median) & whiskers (range), with ‘+’ indicating mean. *, P<0.05 for clinical response group, Yes vs. No, at indicated visit. CRP = C-reactive protein. IL-6 = interleukin-6. ESR = erythrocyte sedimentation rate. OL = open-label.
